# Supplementary material for: A mixture model for expression deconvolution from RNA-seq in heterogeneous tissues
Source: PubMed Central journal article supplement (PMC3622628; doi:10.1186/1471-2105-14-s5-s11), 2013-04-10
Supplement: 1471-2105-14-S5-S11-S1.pdf [file 1471-2105-14-S5-S11-S1.pdf]

## Supplementary

### Bias weight calculation

To calculate the bias weight in Equation (13), we used the bin method and Markov chain for positional bias and sequence-specific bias respectively, which are described here.

**Positional bias** To capture the positional bias, we binned the relative positions within a transcript into 10 bins. The number of reads aligned to each bin were then counted for read set  $\mathcal{R}^p$  and  $\mathcal{R}^m$  respectively. If a read aligns to multiple transcripts, the count is then evenly divided and assigned to each transcript. It is reported in [1] that the positional bias is correlated to the transcript length, thus we further categorized the lengths of transcripts into 5 categories in Table 1, and added up the counts of each category. Denote  $\mathcal{C}^p = \{c_{m,n}^p | m = 1, \dots, 10, n = 1, \dots, 5\}$  as the counts added up from  $\mathcal{R}^p$ , where  $c_{m,n}^p$  is the number of reads aligned to bin  $m$  of transcript category  $n$  within read set  $\mathcal{R}^p$ . Thus, if the starting position  $b_{i,t}^p$  of read  $i$  aligning to transcript  $t$  lies within bin  $m$  of transcript  $t$  and transcript  $t$  is in category  $n$  according to its length, the probability of observing  $b_{i,t}^p$  under positional bias model is then given by:

$$\mathbb{P}(b_{i,t}^p | bias) = \frac{c_{m,n}^p}{\sum_{k=1}^{10} c_{k,n}^p} \quad (1)$$

While the probability of observing  $b_{i,t}^p$  under uniform model is  $\mathbb{P}(b_{i,t}^p | uniform) = \frac{1}{10}$ , since the starting positions of reads are assumed to be uniformly distributed across the 10 bins of a transcript. The bias weight for read set  $\mathcal{R}^m$  is similar defined.

**Sequence specific bias** We used a first order Markov chain to capture the sequence specific bias. Given the definition of  $\pi_{i,t}^s$  in section 2.3, we used  $L = 21$  as the window size. The probabilities  $\mathbb{P}(\pi_{i,t}^s | bias), \mathbb{P}(\pi_{i,t}^s | uniform)$  in Equation (13) are given by:

$$\mathbb{P}(\pi_{i,t}^s | bias) = \mathbb{P}(\pi_{i,t,1}^s | bias) \prod_{j=2}^{21} \mathbb{P}(\pi_{i,t,j}^s | \pi_{i,t,j-1}^s, bias) \quad (2)$$

$$\mathbb{P}(\pi_{i,t}^s | uniform) = \mathbb{P}(\pi_{i,t,1}^s | uniform) \prod_{j=2}^{21} \mathbb{P}(\pi_{i,t,j}^s | \pi_{i,t,j-1}^s, uniform) \quad (3)$$

for  $s = p$  or  $m$ .

$\pi_{i,t,j}^s \in \{A, C, G, T\}$  is the  $j$ th nucleotide of sequence  $\pi_{i,t}^s$  regarding the alignment strand.  $\mathbb{P}(\pi_{i,t,1}^s | bias)$  and  $\mathbb{P}(\pi_{i,t,1}^s | uniform)$  are the empirical distribution of one nucleotide observed under the bias model and the uniform model respectively, while  $\mathbb{P}(\pi_{i,t,j}^s | \pi_{i,t,j-1}^s, bias)$  and  $\mathbb{P}(\pi_{i,t,j}^s | \pi_{i,t,j-1}^s, uniform)$  are the empirical conditional distributions of dinucleotide. The empirical distributions under the bias model were calculated based on the local sequences of all the alignments observed from read set  $\mathcal{R}^p$  and  $\mathcal{R}^m$  respectively. The

Table 1: The 5 categories of transcripts defined by their lengths.

| Categories | Transcript Lengths (bp) |
|------------|-------------------------|
| 1          | 1 ~ 791                 |
| 2          | 792 ~ 1265              |
| 3          | 1266 ~ 1707             |
| 4          | 1708 ~ 2433             |
| 5          | 2434 ~ $+\infty$        |

empirical distributions under the uniform model were calculated based on all the short sequences of window size 21 across the whole length of each transcript from the reference transcript set.

## References

1. Bohnert R, R atsch G: **rQuant. web: a tool for RNA-Seq-based transcript quantitation.** *Nucleic acids research* 2010, **38**(suppl 2):W348–W351.
